# Supplementary material for: Rice husk-derived hybrid lithium-ion capacitors with ultra-high energy
Source: Royal Society of Chemistry journal article supplement (doi:10.1039/c7ta07088h), 2017-01-01
Supplement: c7ta07088h1.pdf [file c7ta07088h1.pdf]

## Supporting information

### **Rice Husk-Derived Hybrid Lithium-Ion Capacitors with Ultra-High Energy**

Bo Li,<sup>a</sup> Zhujun Xiao,<sup>a</sup> Ming Chen,<sup>a</sup> Ziyue Huang,<sup>b</sup> Xiaoyong Tie,<sup>c</sup> Jiantao Zai,<sup>\*a</sup> and Xuefeng Qian<sup>\*a</sup>

- a. School of Chemistry and Chemical Engineering and State Key Laboratory of Metal Matrix Composites, Shanghai Jiao Tong University, Shanghai, 200240 (P. R. China)
- b. Shanghai Qibao High School, Shanghai, 2001101, P. R. China
- c. Hubei Land Resources Vocational College, Wuhan, 430090, P. R. China

*Keywords:* Rice husk, Silicon anode, hierarchical porous carbon, lithium-ion capacitors

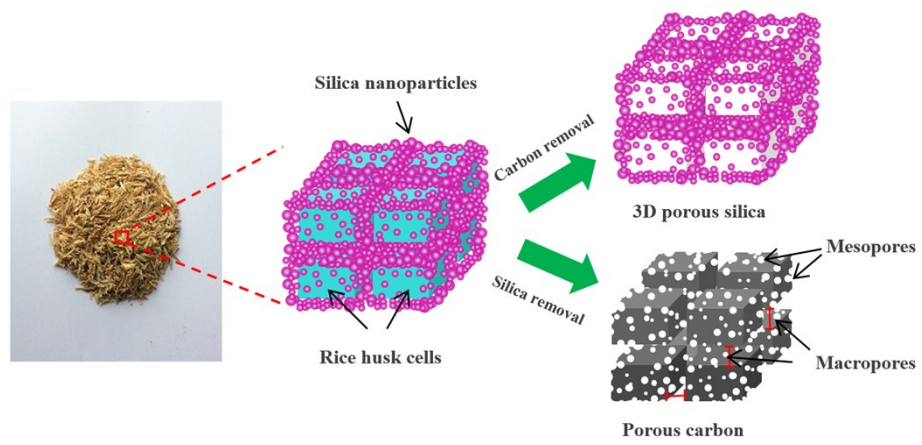

**Fig. S1. Schematic showing the microstructure of husks.**

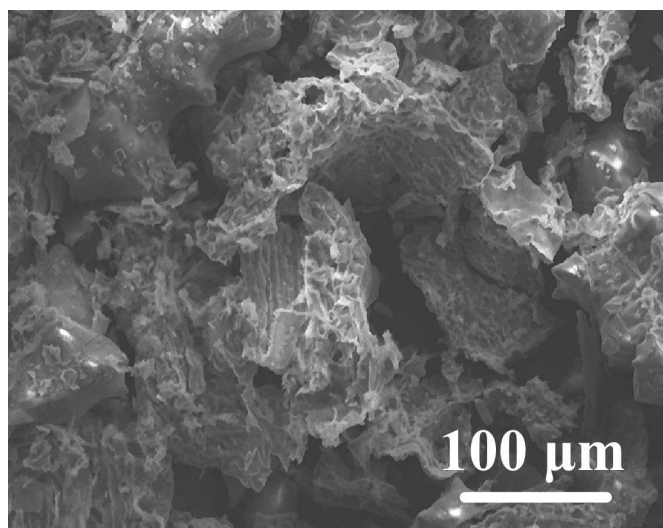

**Fig. S2. SEM of RHs-derived SiO<sub>2</sub>.**

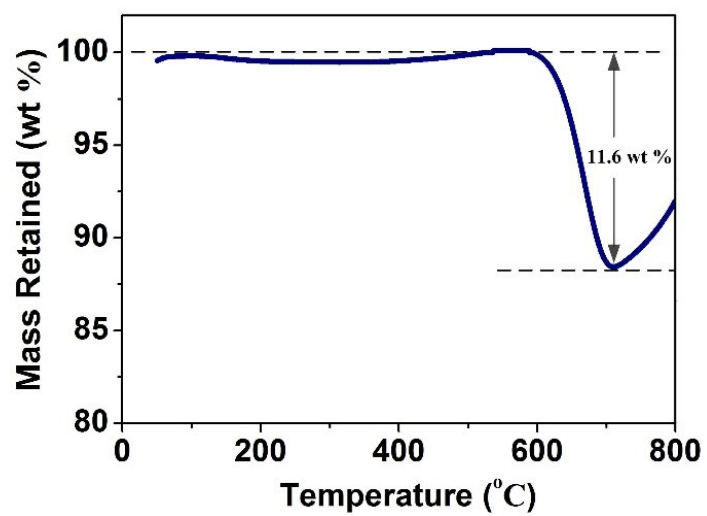

Fig. S3. TGA curve of Si/C.

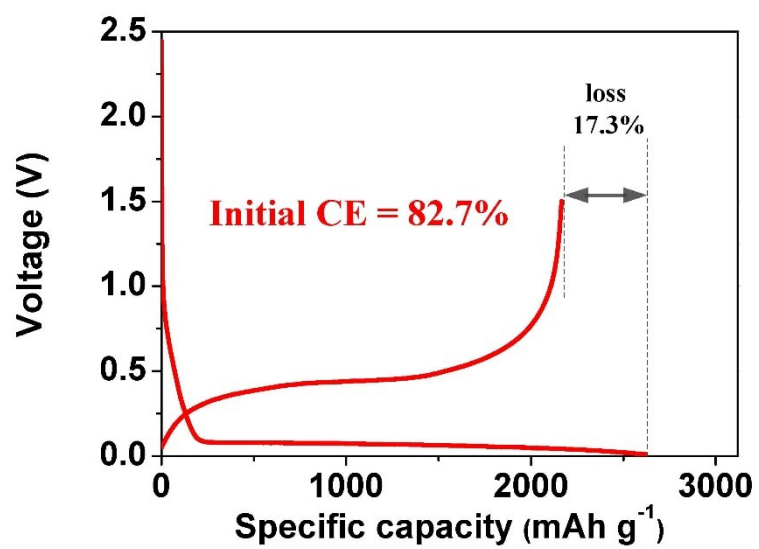

Fig. S4. The first charge and discharge profiles of Si/C.

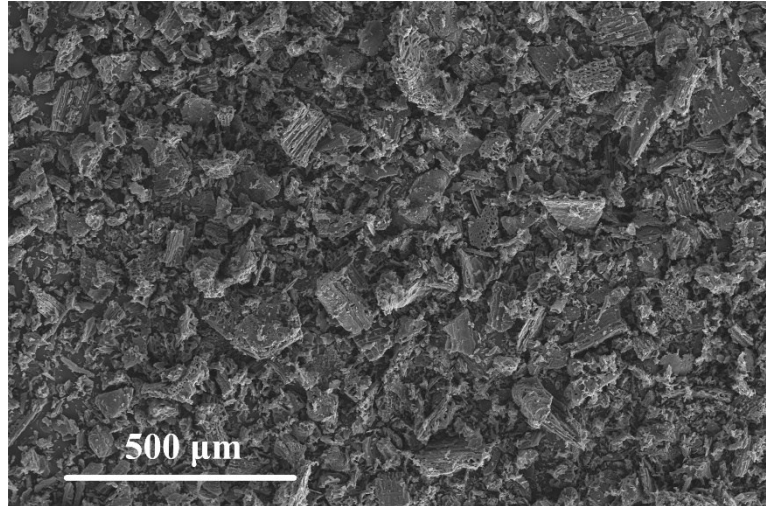

**Fig. S5. SEM image of RAC-5.**

Table S1

| Element | Without HCl treatment | HCl treatment |
|---------|-----------------------|---------------|
| Fe      | 0.418                 | 0.082         |
| Mn      | 0.067                 | 0.003         |
| Na      | 0.285                 | 0.112         |
| K       | 0.437                 | 0.178         |
| Ga.     | 1.095                 | 0.325         |

Contents of metallic ingredients in wt% for RAC with and without HCl treatment

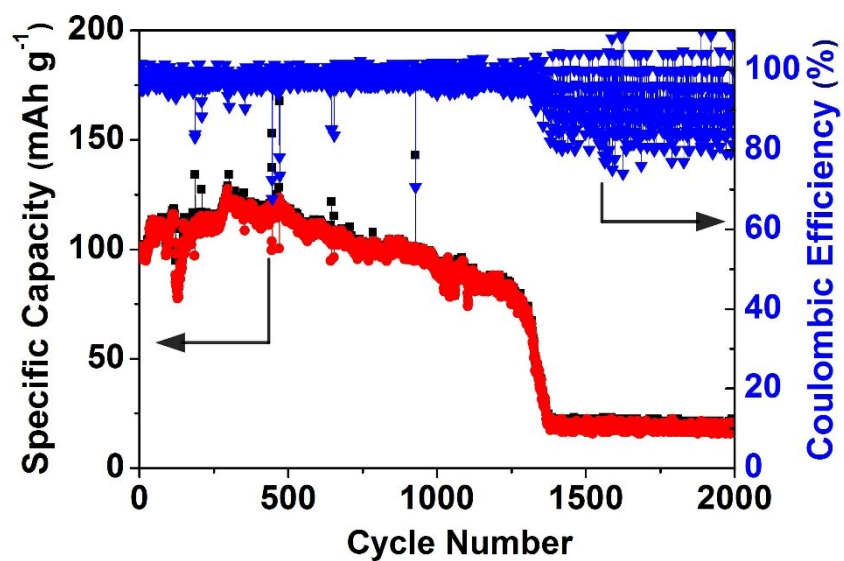

Fig. S6. Cycling performance of RAC material without HCl treatment.

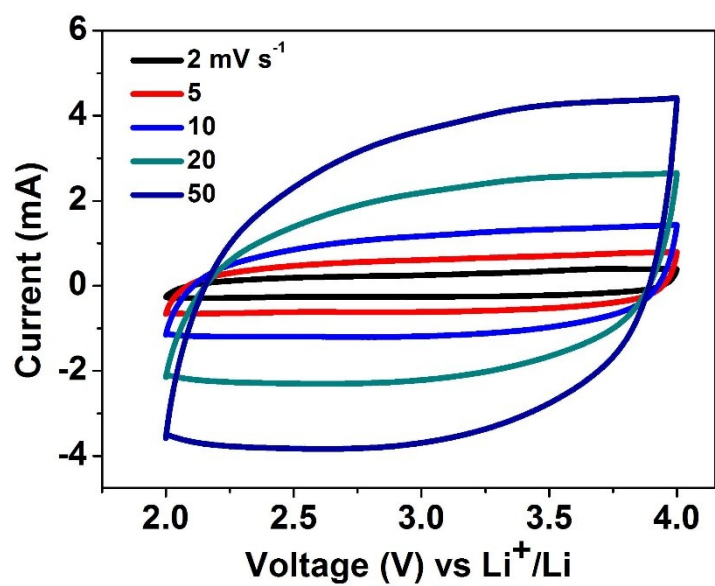

Fig. S7. CV curves at different scan rates of Si/C||RAC-5 LICs.



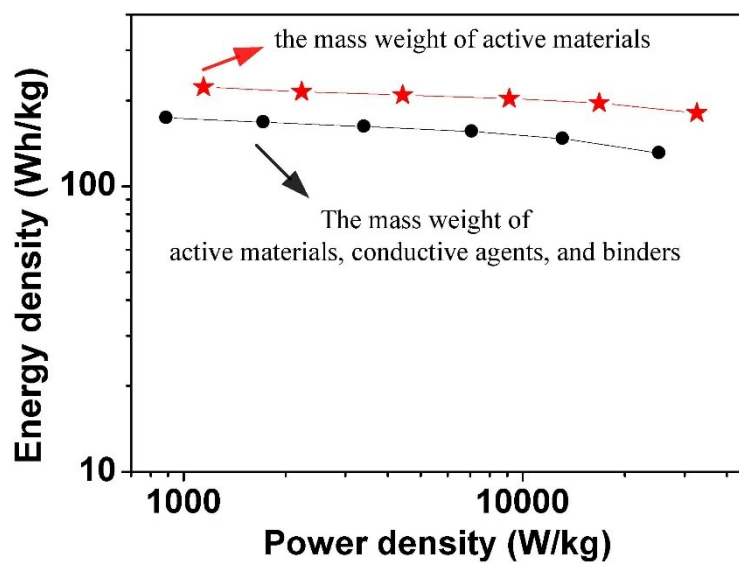

**Fig. S8.** The energy density and power density of LICs calculated by mass weight of active materials, conductive agents, and binders.

**Table S2.** Calculated energy density and power density of LICs by the mass weight of active materials, conductive agents, and binders.

|                                            |     |      |      |      |       |       |
|--------------------------------------------|-----|------|------|------|-------|-------|
| <b>Power density (W kg<sup>-1</sup>)</b>   | 890 | 1722 | 3407 | 7086 | 13125 | 25265 |
| <b>Energy density (Wh kg<sup>-1</sup>)</b> | 174 | 168  | 162  | 156  | 147   | 131   |
